# Supplementary material
Source: PubMed Central journal article supplement (PMC3464421)
Supplement: Supp_Fig1.pdf [file Supp_Fig1.pdf]

## Supplementary Data

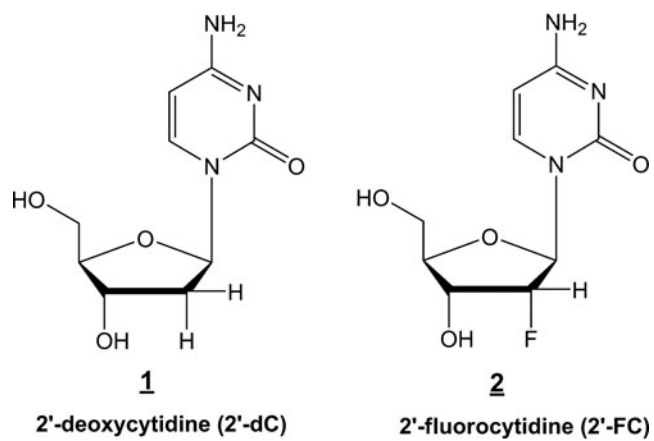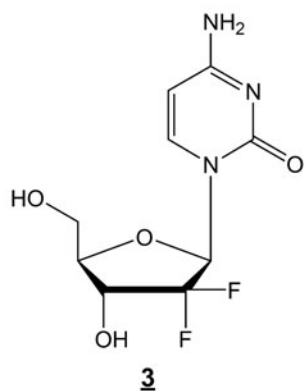

**2',2'-difluoro, 2' deoxycytidine (Gemcitabine, dFdC)**

SUPPLEMENTARY FIG. S1. Chemical structure of 2'-deoxycytidine, 2'-fluorocytidine, and 2',2'-difluoro, 2'-deoxycytidine.
