# Supplementary material
Source: PubMed Central journal article supplement (PMC3464421)
Supplement: Supp_Fig2.pdf [file Supp_Fig2.pdf]

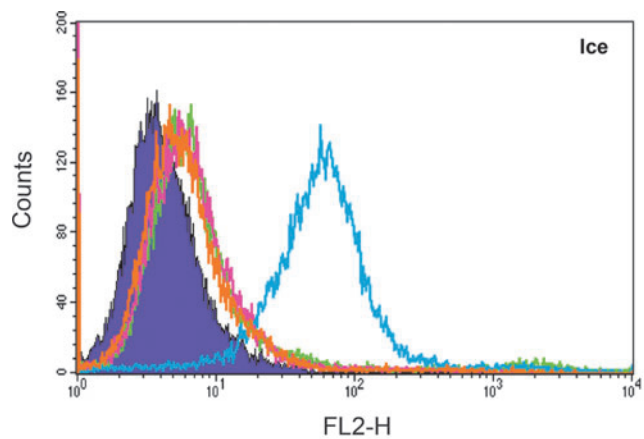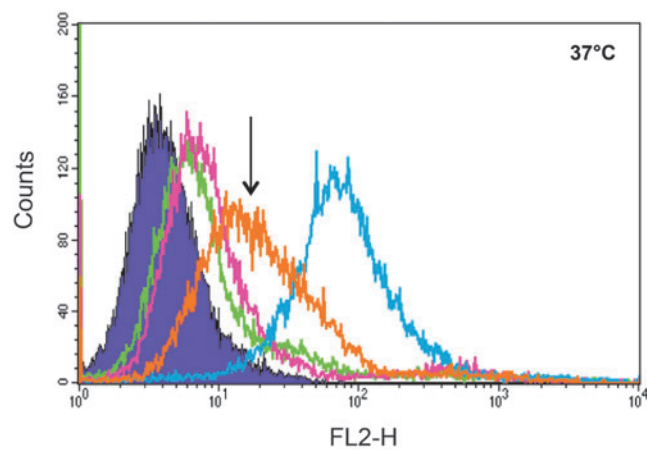

| Geo Mean      |   |    |       |
|---------------|---|----|-------|
| E07-Wing      | — | F1 | 75.75 |
| E07-Wing, RS  | — | F2 | 19.68 |
| mE07-Wing     | — | F0 | 8.64  |
| mE07-Wing, RS | — |    | 9.71  |

**SUPPLEMENTARY FIG. S2.** E07 is internalized by the MiaPaCa-2 cells. E07 (blue and orange) and the mE07 (green and pink) labeled with the fluorophore phycoerythrin (PE) were incubated with the MiaPaCa-2 cells either on ice (*upper panel*) or at 37°C (*lower panel*) for 30 minutes. After the binding reactions, the cells were treated with Riboshredder (RS) for 10 minutes at room temperature (pink and orange). The cells were analyzed by using FACSCalibur. Counts represent the number of events counted. The arrow indicates the E07 bound to the cells after RS treatment at 37°C (orange) presumably due to aptamer internalization. Quantitation of the histograms is presented in tabular form as Geo Means for the corresponding peaks.
